# Supplementary material for: Alkali-promoted indium oxide as a highly active and selective catalyst for photo-thermal CO 2 hydrogenation
Source: Royal Society of Chemistry journal article supplement (doi:10.1039/d4ta04387a), 2024-01-01
Supplement: d4ta04387a1.pdf [file d4ta04387a1.pdf]

Electronic Supplementary Material (ESI) for Journal of Materials Chemistry A.

## Supporting Information

### Alkali-promoted indium oxide as highly active and selective catalyst for the photo-thermal CO<sub>2</sub> hydrogenation

Xinhuilan Wang <sup>a</sup>, Alejandra Rendón-Patiño <sup>a</sup>, Jean Marcel R. Gallo <sup>a</sup>, Diego Mateo\* <sup>a</sup>, and Jorge Gascon\* <sup>a</sup>

<sup>a</sup> Advanced Catalytic Materials (ACM), KAUST Catalysis Center (KCC), King Abdullah University of Science and Technology (KAUST), Thuwal 23955-6900, Saudi Arabia.

E-mail: diego.mateo@kaust.edu.sa; jorge.gascon@kaust.edu.sa

#### 1. Catalyst Characterization

Powder X-ray diffraction (PXRD) analysis was conducted employing a Bruker D8 diffractometer configured in the Bragg-Brentano geometry. Cu K $\alpha$  radiation ( $\lambda=1.5418$  Å) was utilized, with operational parameters set at 40 kV and 40 mA for voltage and current respectively. Data collection spanned the  $2\theta$  range from 10 to 80 °, with increments of 0.02 ° and a time of 7 seconds per step.

Thermogravimetric (TG) measurements were recorded in an air atmosphere employing a Mettler-Toledo thermal analyzer. The temperature was ramped at a rate of 5 °C per minute within the range of 25 °C to 800 °C, while maintaining a gas flow of 25 mL · min<sup>-1</sup>.

N<sub>2</sub> adsorption-desorption measurements were performed using a Micromeritics ASAP 2040 instrument at 77 K. Prior to the analysis, the catalysts underwent a degassing process under vacuum at 150 °C for 720 minutes.

The UV-Vis spectra were conducted by using a JASCO V-670 spectrophotometer. The diffuse reflectance spectra were obtained in a range of 300 – 1500 nm using halogen and deuterium lamps as light sources.

Raman spectroscopy was performed using a confocal Raman microscope WITec Apyron equipped with a 532 nm laser and power of 10 mW. The measurements were carried out using an objective lens with a magnification of 50x, and a grating of 1800 g/mm.

The CO<sub>2</sub> temperature-programmed desorption (CO<sub>2</sub>-TPD) analyses were analyzed using a Micromeritics AutoChem 2920 unit. Initially, 200 mg of catalyst was preheated with helium at 200 °C for 60 minutes, followed by cooling to 50 °C. Subsequently, the catalyst was exposed to a CO<sub>2</sub> flow for 60 minutes. To eliminate physically adsorbed CO<sub>2</sub>, the treated catalyst underwent helium flushing at the same temperature for 30 minutes. Following this, the catalyst was subjected to heating in a helium flow up to 800 °C, with a heating rate of 10 °C · min<sup>-1</sup>, to observe the CO<sub>2</sub>-TPD signal.

*In situ* diffuse reflectance infrared Fourier transform spectroscopy (DRIFTS) measurements were registered using the Kubelka-Munk mode on a Thermo Scientific Nicolet 6700 series Fourier transform infrared (FT-IR) spectrometer equipped with a Harrick Praying Mantis High-Temperature reaction chamber. The sample was placed into the catalyst bed and packed. Before the collection of spectra, the sample was preheated to 200 °C under a He flow of 20 mL · min<sup>-1</sup>, and the background spectra were collected with 248 scans at 4 cm<sup>-1</sup> resolution. After that, a mixture of H<sub>2</sub> and CO<sub>2</sub> (4:1) was introduced into the chamber at a flow of 20 mL · min<sup>-1</sup>. Once the reaction chamber was purged, it was pressurized to 10 bar. IR spectra were recorded with 64 scans at 4 cm<sup>-1</sup> resolution every 2 min in the temperature range from 20 °C to 350 °C (ramp rate 3 °C·min<sup>-1</sup>). To investigate the effect of illumination on both the reaction pathway and intermediates, light was introduced into the reaction chamber during the DRIFTS measurements using a white LED source (UHP-T-WCS-DI, Prizmatrix).

The CO<sub>2</sub> temperature-programmed desorption (CO<sub>2</sub>-TPD) analyses were performed using the same equipment as the above-mentioned *in-situ* DRIFTS experiments. Prior to collecting the background, the sample was preheated with a flow of helium at 200 °C for 30 minutes. The background spectra were collected with 248 scans at 4 cm<sup>-1</sup> resolution when sample cooled down to 50 °C. After that, the sample was exposed to a flow of CO<sub>2</sub> for 60 minutes and then flushed with helium for 30 minutes at 50 °C. Subsequently, the temperature was increased from 50 to 600 °C at a ramping rate of 5 °C·min<sup>-1</sup> under a flow of helium. During this stage, IR spectra were recorded with 64 scans at 4 cm<sup>-1</sup> resolution every 2 min. Meanwhile, the corresponding gas phase evolution was monitored via INFICON Transpector CPM100 mass spectrometry (MS).

In the case of hydrogen temperature-programmed reduction (H<sub>2</sub>-TPR) analyses, the samples were initially pretreated at 200 °C for 30 minutes under He flow. After cooling down to room temperature, the H<sub>2</sub>-TPR measurement was performed by recording the amount of H<sub>2</sub> consumption via INFICON Transpector CPM100 mass spectrometry (MS) while heating the catalyst from 20 °C to 600 °C at a rate of 5 °C · min<sup>-1</sup> under a gas flow of 6 vol% H<sub>2</sub>/Ar. The H<sub>2</sub>-TPR measurement was conducted both under dark and light conditions using a white LED source, as previously indicated.

X-ray photoelectron spectroscopy (XPS) measurements were performed using a Kratos Axis Ultra DLD instrument equipped with a monochromatic  $\text{Al}_{K\alpha}$  X-ray source ( $h\nu=1486.71$  eV) operating at 150 W under ultra-high vacuum ( $\approx 10^{-9}$  mbar). Photoelectron peak C1s (284.8 eV for adventitious carbon) was used for binding energy correction.

Dark-field imaging was conducted using scanning transmission electron microscopy (STEM) with a high-angle annular dark-field (HAADF) detector. The STEM-HAADF data were acquired using a convergence angle of 18.2 mrad and an inner angle of 50 mrad for HAADF. The image size was set to  $2048 \times 2048$  pixels, with a dwell time of 8  $\mu\text{s}$ . Furthermore, a combination of X-ray energy dispersive spectrometer (XEDS) and DF-STEM imaging was employed to obtain STEM-EDS spectral image datasets. The images were configured to a size of  $1024 \times 1024$  pixels, with a dwell time of 4  $\mu\text{s}$  and 100 frames. Subsequently, the generated maps of In, O and Cs underwent mild filtering using a Gaussian filter ( $\sigma = 0.5$ ) and were represented in weight percent (wt %). All STEM samples were prepared on dry copper grids coated with a lacey Carbon film (200 mesh).

## 2. Supplementary Figures

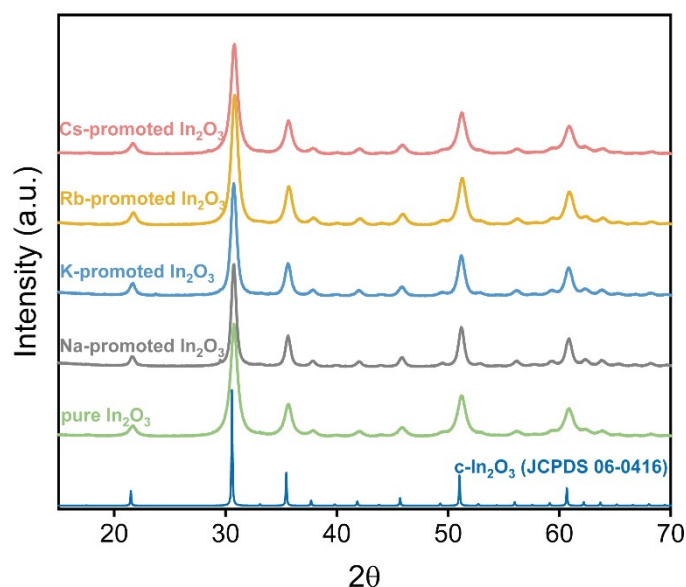

**Fig S1.** PXRD patterns of pure  $\text{In}_2\text{O}_3$  and alkali-promoted  $\text{In}_2\text{O}_3$ .

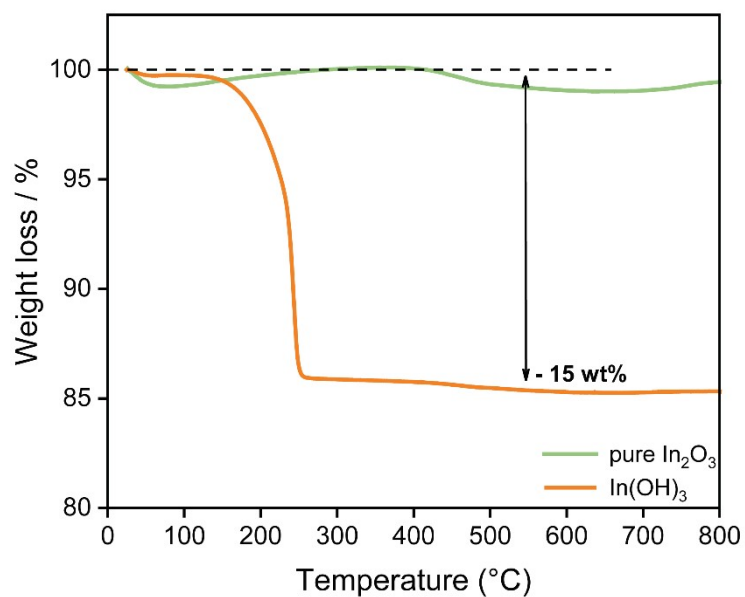

**Fig S2.** TGA of  $\text{In}(\text{OH})_3$  precursor and pure  $\text{In}_2\text{O}_3$ .

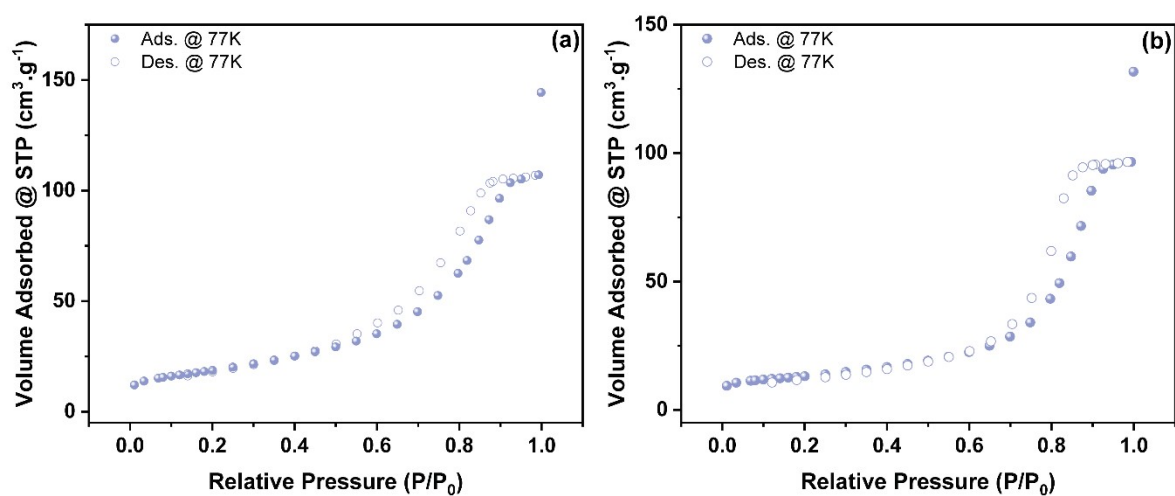

**Fig S3.**  $\text{N}_2$  adsorption isotherms of a) pure  $\text{In}_2\text{O}_3$  and b) Cs-promoted  $\text{In}_2\text{O}_3$  at 77 K.

**Table S1.** Specific surface areas of pure and Cs-promoted  $\text{In}_2\text{O}_3$ .

| Sample                              | Specific surface area           |
|-------------------------------------|---------------------------------|
| Pure $\text{In}_2\text{O}_3$        | $67 \text{ m}^2 \text{ g}^{-1}$ |
| Cs-promoted $\text{In}_2\text{O}_3$ | $44 \text{ m}^2 \text{ g}^{-1}$ |

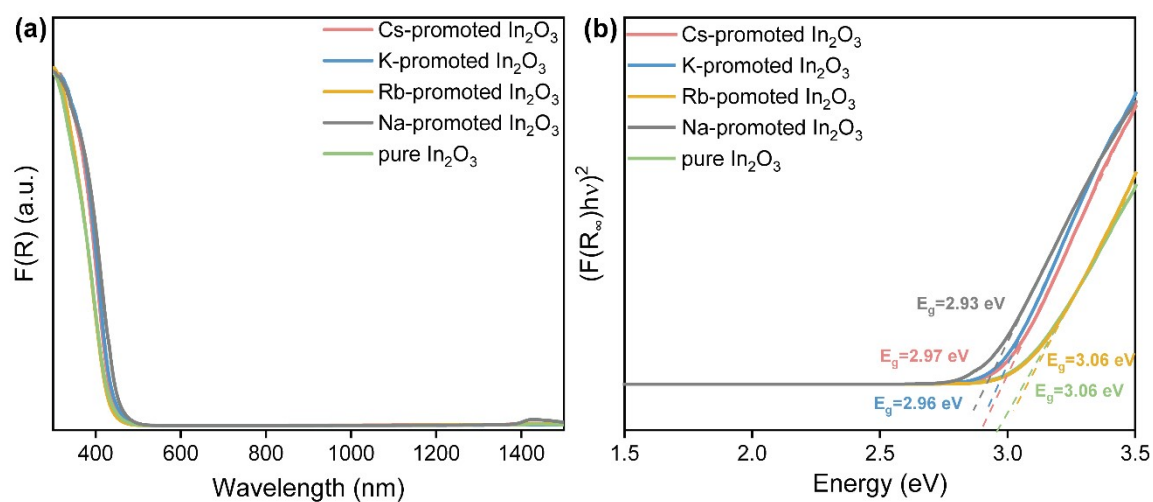

**Fig S4.** a) UV-vis-NIR absorption spectra and b) calculated band gap values of alkali-promoted and pure  $\text{In}_2\text{O}_3$ .

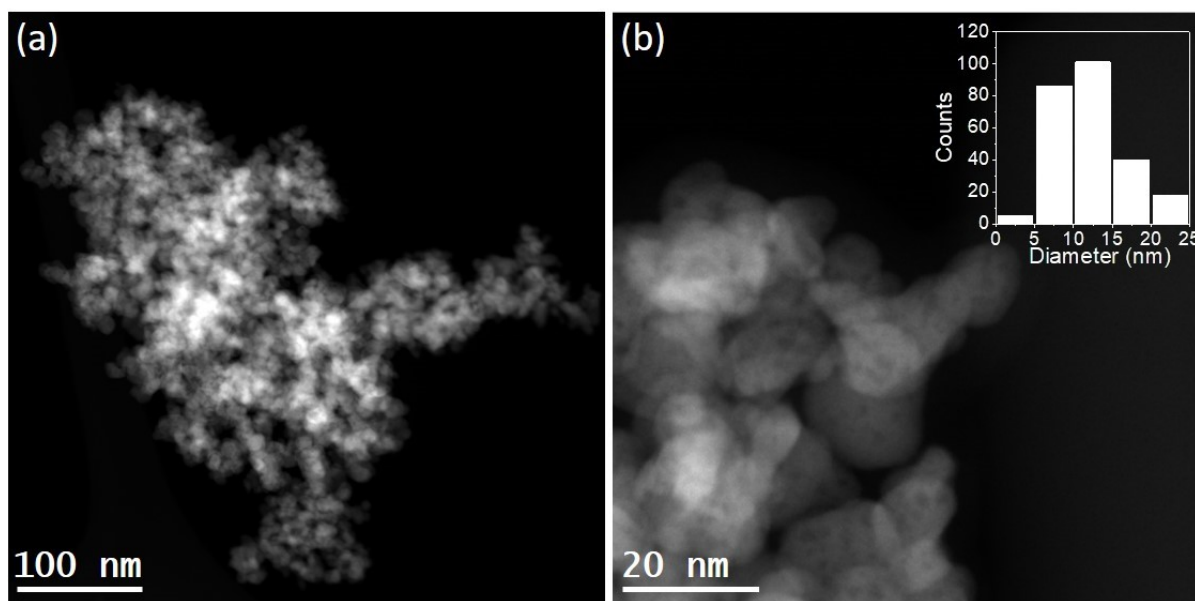

**Fig S5.** STEM images of pure  $\text{In}_2\text{O}_3$  at a) low and b) high magnification. Inset in b) corresponds to the particle size distribution.

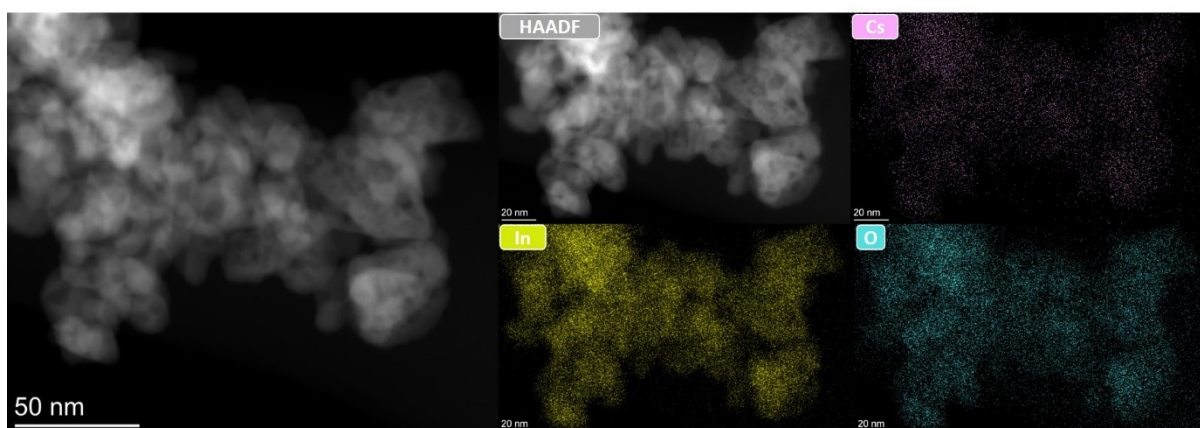

**Fig S6.** STEM images of Cs-promoted  $\text{In}_2\text{O}_3$  with elemental mapping by EDX.

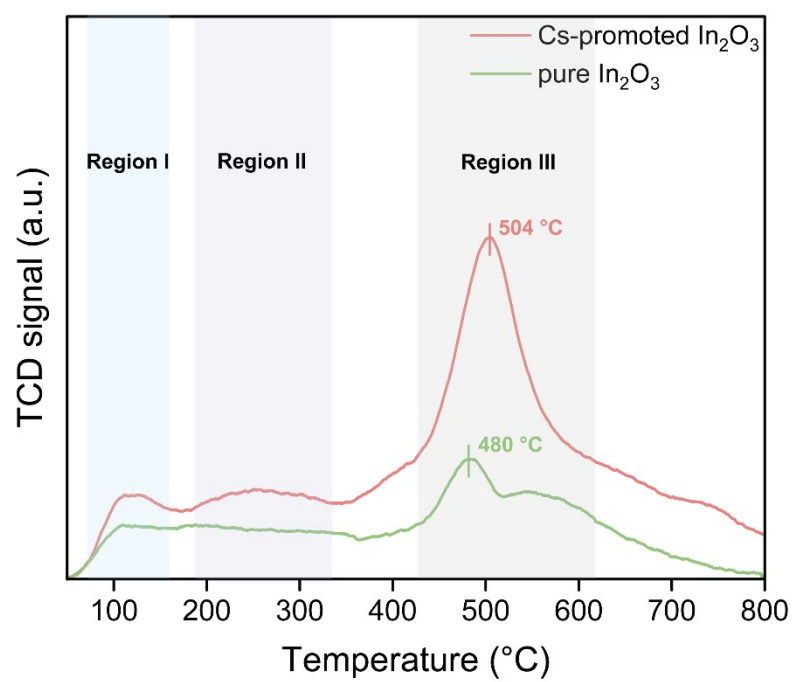

**Fig S7.**  $\text{CO}_2$ -TPD profiles of pure and Cs-promoted  $\text{In}_2\text{O}_3$ .

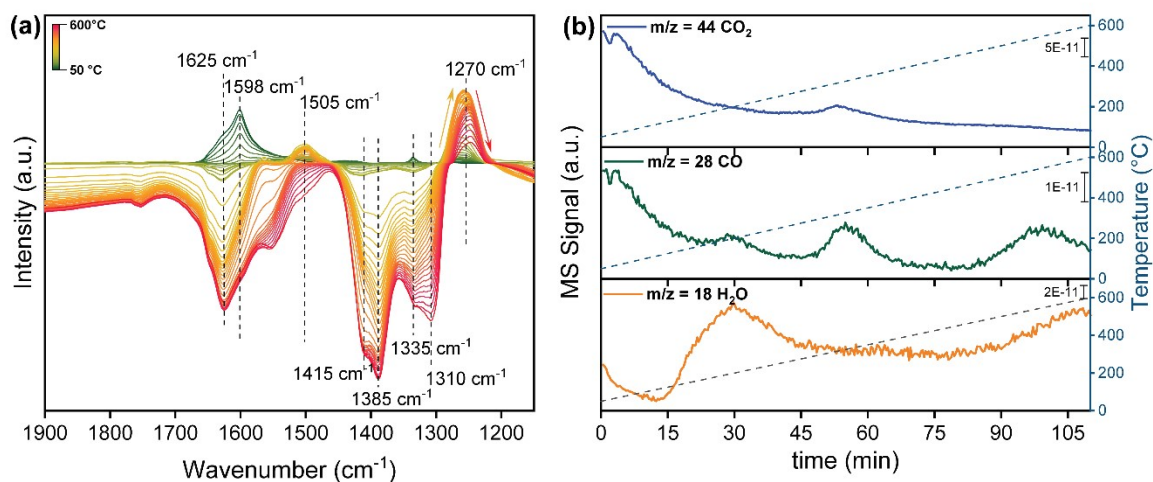

**Fig S8.** a) In-situ DRIFTS spectra of Cs-promoted  $\text{In}_2\text{O}_3$  catalyst and b) corresponding MS signal.

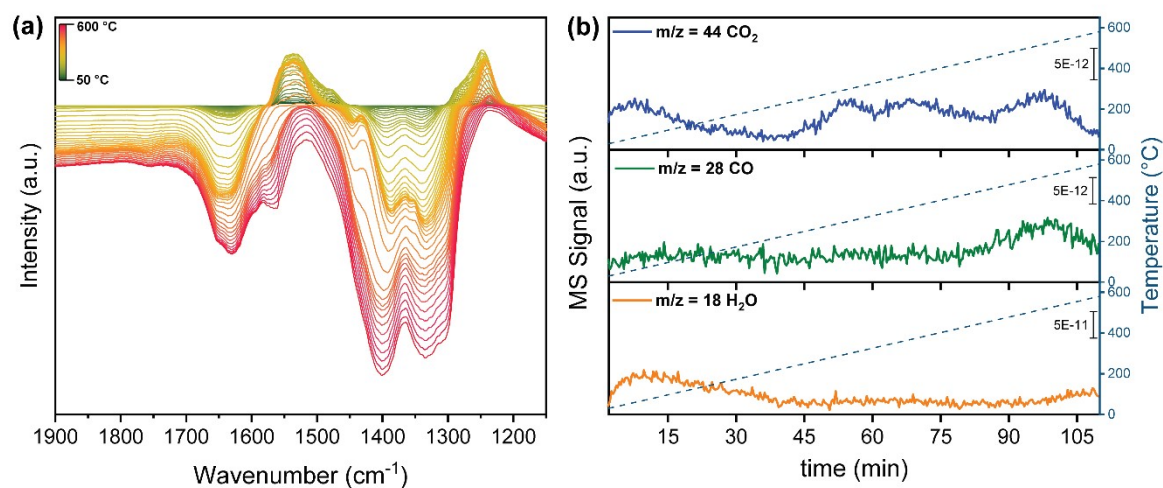

**Fig S9.** a) In-situ DRIFTS spectra of pure  $\text{In}_2\text{O}_3$  catalyst and b) corresponding MS signal.

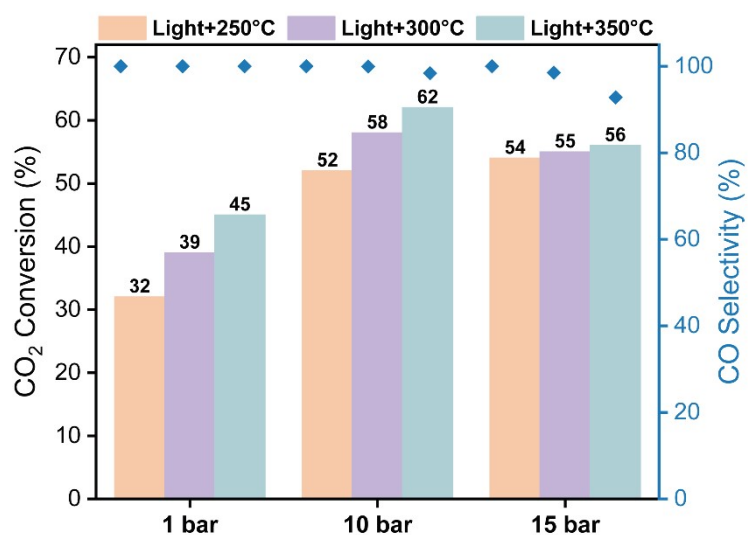

**Fig S10.** Study of the effect of pressure on the photo-thermal RWGS reaction over Cs-promoted  $\text{In}_2\text{O}_3$  with external heating at 250, 300 and 350 °C. Reaction conditions:  $3.3 \text{ W}\cdot\text{cm}^{-2}$  light intensity, GHSV =  $15000 \text{ mL}\cdot\text{h}^{-1}\cdot\text{g}^{-1}$ .

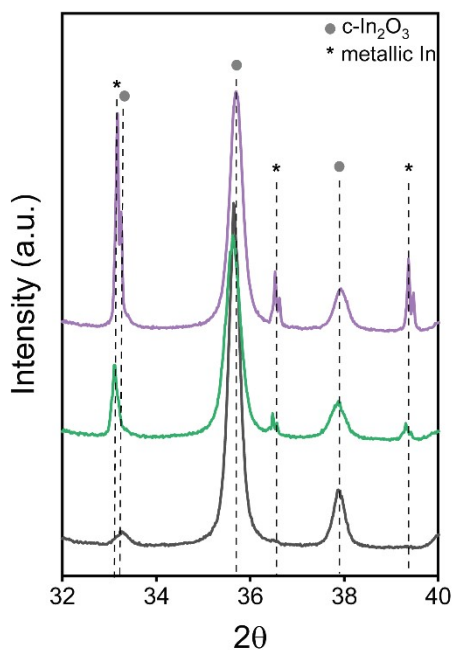

**Fig S11.** PXRD patterns of spent Cs-promoted  $\text{In}_2\text{O}_3$  samples after photo-thermal RWGS reaction at 1 (black line), 10 (green line) and 15 bar (purple line) and 350 °C.

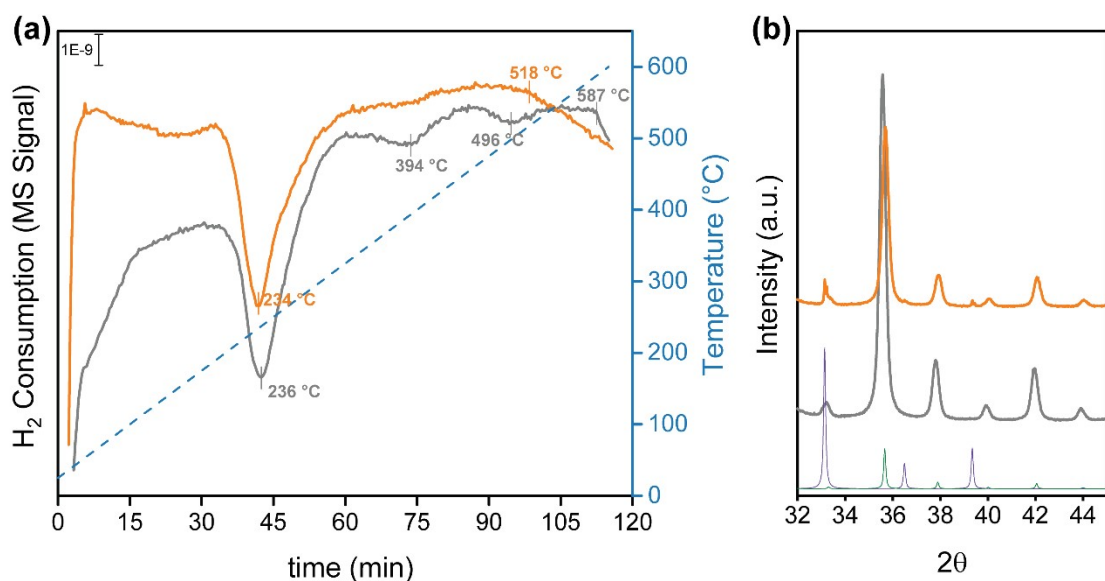

**Fig S12.** a) H<sub>2</sub>-TPR of Cs-promoted In<sub>2</sub>O<sub>3</sub> under dark (grey line) and light irradiation (orange line) conditions. b) PXRD patterns of spent Cs-promoted In<sub>2</sub>O<sub>3</sub> samples after H<sub>2</sub>-TPR under dark (grey line) and light irradiation (orange line) conditions. Simulated XRD patterns for c-In<sub>2</sub>O<sub>3</sub> (green line) and metallic indium (purple line) are included for reference.

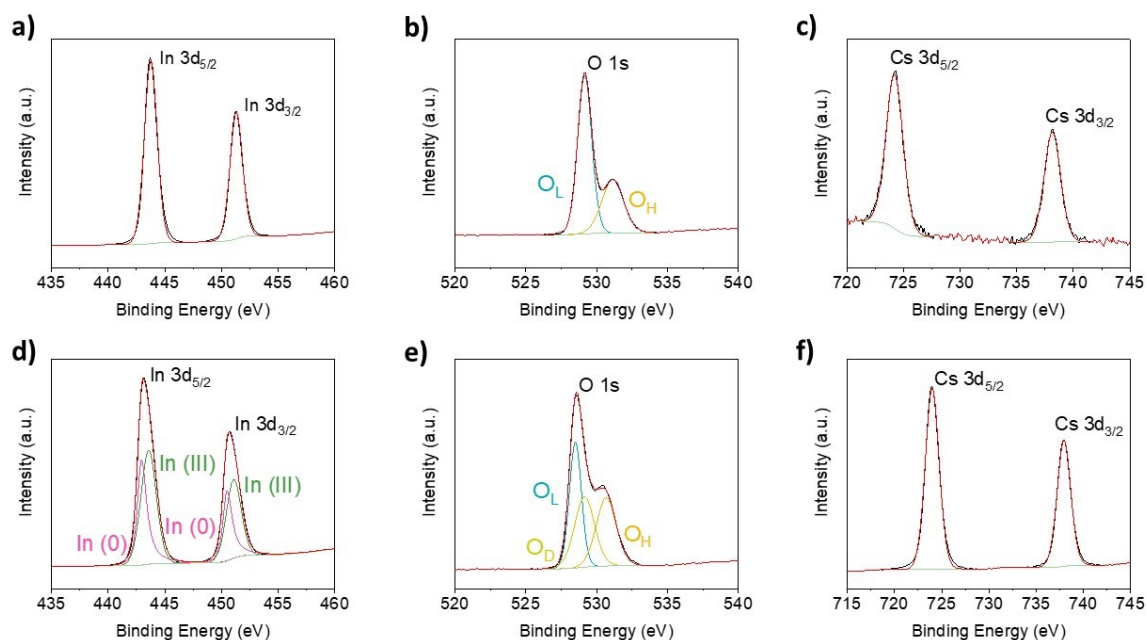

**Fig S13.** XPS measurements of fresh (top) and spent (bottom) Cs-promoted In<sub>2</sub>O<sub>3</sub> sample.

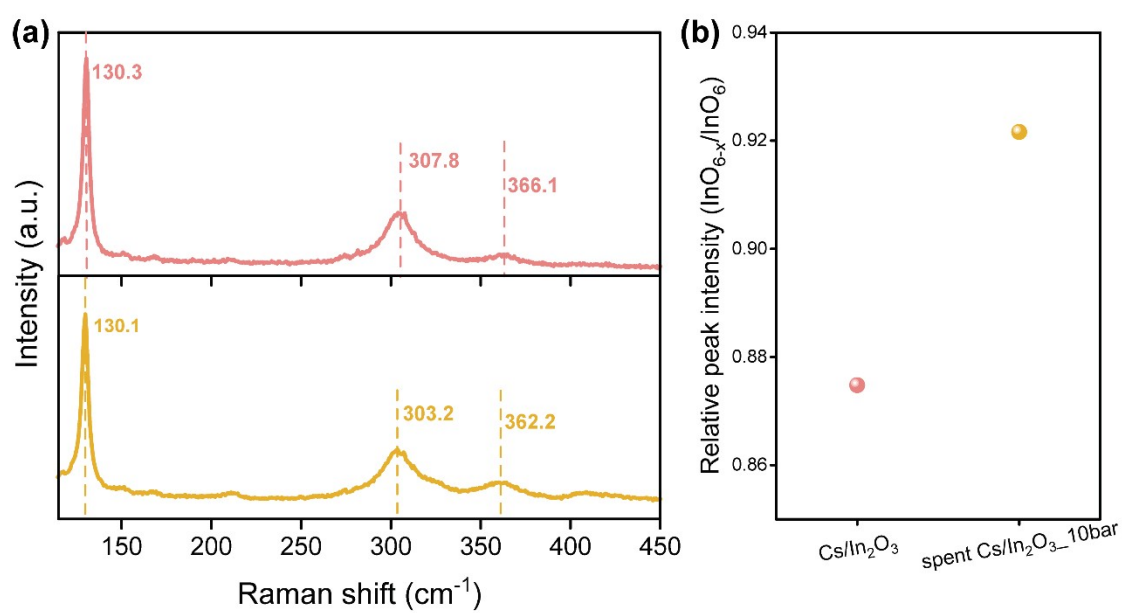

**Fig S14.** a) Raman spectra of fresh (red line) and spent (yellow line) Cs-promoted  $\text{In}_2\text{O}_3$  catalysts. b) Relative peak intensity ratio between  $\text{InO}_{6-x}$  and  $\text{InO}_6$ .

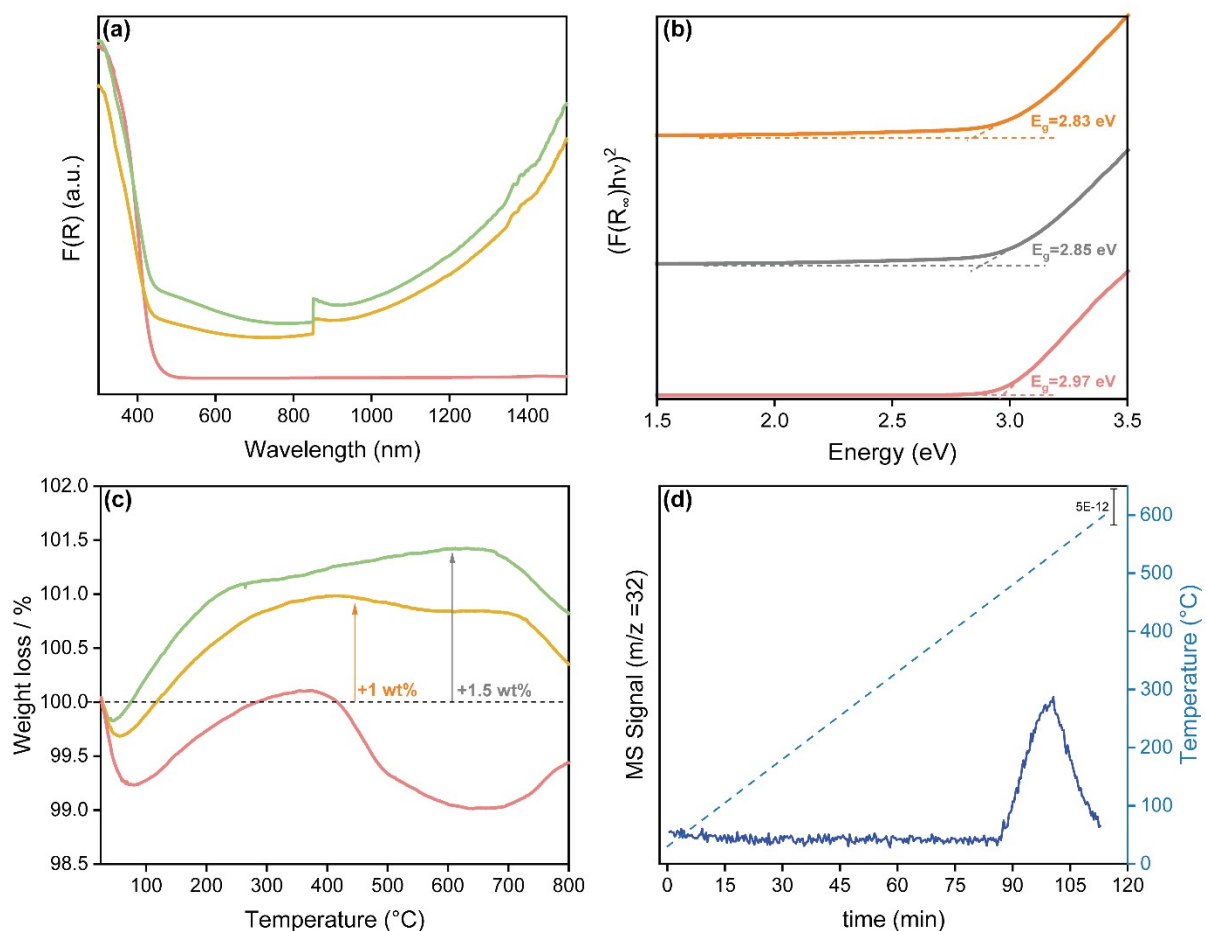

**Fig S15.** a) UV-vis-NIR absorption spectra of fresh Cs-promoted  $\text{In}_2\text{O}_3$  (red line), Cs-promoted  $\text{In}_2\text{O}_3$  after illumination w/o external heating (yellow line) and Cs-promoted  $\text{In}_2\text{O}_3$  after illumination at  $250^\circ\text{C}$  (green line). b) calculated band gap values of fresh Cs-promoted  $\text{In}_2\text{O}_3$  (red line), spent Cs-promoted  $\text{In}_2\text{O}_3$  after photothermal reaction at  $250^\circ\text{C}$  and 1 bar (grey line) and spent Cs-promoted  $\text{In}_2\text{O}_3$  after photothermal reaction at  $250^\circ\text{C}$  and 10 bar (orange line). c) TGA curves of fresh Cs-promoted  $\text{In}_2\text{O}_3$  (red line), Cs-promoted  $\text{In}_2\text{O}_3$  after illumination w/o external heating (yellow line) and Cs-promoted  $\text{In}_2\text{O}_3$  after illumination at  $250^\circ\text{C}$  (green line). d) MS results for gas phase analysis of Cs-promoted  $\text{In}_2\text{O}_3$  under light illumination.

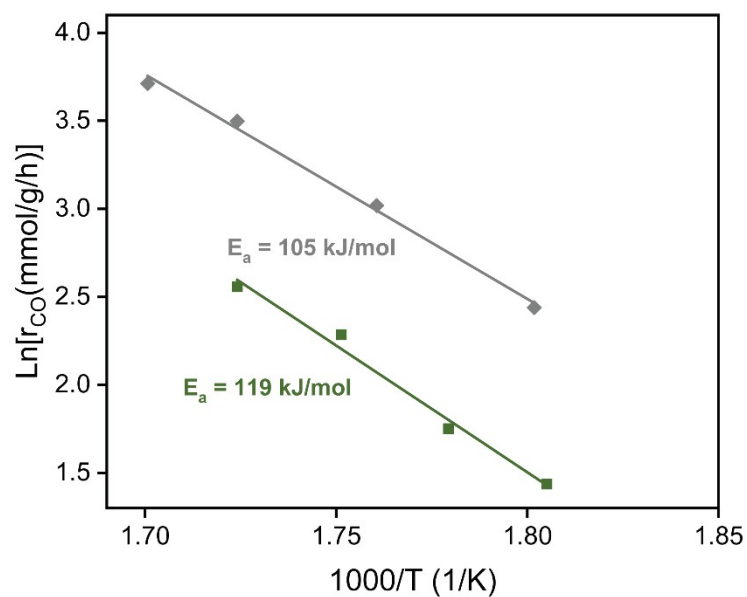

**Fig S16.** Calculated activation energies of Cs-promoted  $\text{In}_2\text{O}_3$  under light (grey line) and dark (olive line).

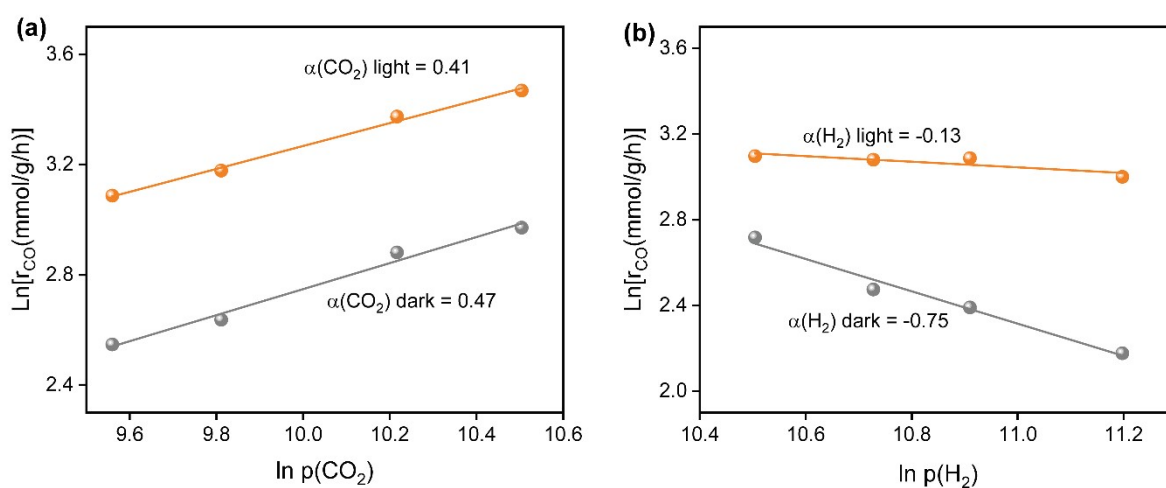

**Fig S17.** Dependence of CO production rate on the partial pressures of a)  $\text{CO}_2$  and b)  $\text{H}_2$  under light irradiation (orange spheres) and dark conditions (grey spheres), over Cs-promoted  $\text{In}_2\text{O}_3$ . Reaction conditions:  $3.3 \text{ W}\cdot\text{cm}^{-2}$  light intensity, GHSV =  $15000 \text{ mL}\cdot\text{h}^{-1}\cdot\text{g}^{-1}$ , 1 bar.

### 3. Supplementary Tables

**Table S2.** Surface temperature and the difference of CO<sub>2</sub> conversion of direct and indirect illumination over Cs-promoted In<sub>2</sub>O<sub>3</sub> catalyst

| Reaction condition | Surface temperature <sup>[a]</sup> (°C) | Surface temperature <sup>[b]</sup> (°C) | Difference of CO <sub>2</sub> conversion Δ(%) |
|--------------------|-----------------------------------------|-----------------------------------------|-----------------------------------------------|
| Light              | 233                                     | 230                                     | 84.8                                          |
| Light+250°C        | 315                                     | 311                                     | 60.8                                          |
| Light+300°C        | 358                                     | 353                                     | 34.4                                          |

[a]: direct illumination; [b]: indirect illumination cover Ti<sub>2</sub>O<sub>3</sub>

**Table S3.** Surface temperature of direct and indirect light illumination under different light intensities over Cs-promoted In<sub>2</sub>O<sub>3</sub> catalyst.

| Light intensity (W·cm <sup>-2</sup> ) | Surface temperature <sup>[a]</sup> (°C) | Surface temperature <sup>[b]</sup> (°C) |
|---------------------------------------|-----------------------------------------|-----------------------------------------|
| 3.3                                   | 315                                     | 312                                     |
| 3                                     | 307                                     | 303                                     |
| 2.52                                  | 295                                     | 291                                     |
| 2.15                                  | 284                                     | 280                                     |
| 1.75                                  | 275                                     | 273                                     |
| 1.37                                  | 266                                     | 264                                     |

[a]: direct illumination; [b]: indirect illumination cover Ti<sub>2</sub>O<sub>3</sub>

**Table S4.** Performance comparison of different photocatalysts for CO<sub>2</sub> hydrogenation

| Catalyst                                                                           | H <sub>2</sub> : CO <sub>2</sub> | Reactor type | Light source          | P      | T (°C)             | CO production (mmol·g <sup>-1</sup> ·h <sup>-1</sup> ) | CO Selectivity | Ref.      |
|------------------------------------------------------------------------------------|----------------------------------|--------------|-----------------------|--------|--------------------|--------------------------------------------------------|----------------|-----------|
| Cs/In <sub>2</sub> O <sub>3</sub>                                                  | 4 : 1                            | flow         | 300W Xe lamp          | 1 bar  | 230 <sup>[a]</sup> | <b>28</b>                                              | 100%           | this work |
|                                                                                    |                                  | flow         | 300W Xe lamp + 250 °C | 1 bar  | 303 <sup>[a]</sup> | <b>38</b>                                              | 100%           |           |
|                                                                                    |                                  | flow         | 300W Xe lamp + 250 °C | 10 bar | 298 <sup>[a]</sup> | <b>67</b>                                              | 100%           |           |
|                                                                                    |                                  | flow         | 300W Xe lamp + 300 °C | 10 bar | 345 <sup>[a]</sup> | <b>74</b>                                              | 100%           |           |
| Fe/Al <sub>2</sub> O <sub>3</sub>                                                  | 4 : 1                            | batch        | 300W Xe lamp          | -      | 310                | 20                                                     | 95.96%         | 1         |
| 2%Ni-LaInO <sub>3</sub>                                                            | 4 : 1                            | flow         | 3 W/cm <sup>2</sup>   | -      | -                  | 26                                                     | 100%           | 2         |
| In <sub>2</sub> O <sub>3-x</sub>                                                   | 1 : 1                            | batch        | 300W Xe lamp          | -      | 340                | 103.21                                                 | 100%           | 3         |
| Bi <sub>x</sub> In <sub>2-x</sub> O <sub>3</sub>                                   | 1 : 1                            | batch        | 300W Xe lamp          | 30 psi | -                  | 8                                                      | -              | 4         |
| In <sub>2</sub> O <sub>3-x</sub> (OH) <sub>y</sub> /Nb <sub>2</sub> O <sub>5</sub> | 1 : 1                            | batch        | 300W Xe lamp          | 27 psi | -                  | 1.4                                                    | 100%           | 5         |

|                                                                  |       |       |              |        |     |                                            |      |   |
|------------------------------------------------------------------|-------|-------|--------------|--------|-----|--------------------------------------------|------|---|
| In <sub>2</sub> O <sub>3-x</sub> /In <sub>2</sub> O <sub>3</sub> | 1 : 1 | batch | 300W Xe lamp | 30 psi | -   | 23.88                                      | 100% | 6 |
|                                                                  | 1 : 1 | flow  |              | 1 bar  | 300 | 0.16 mmol·m <sup>-2</sup> ·h <sup>-1</sup> | 100% |   |
| In <sub>2</sub> O <sub>3-x</sub> (OH) <sub>y</sub> /SiNW         | 1 : 1 | batch | 300W Xe lamp | 2 atm  | 150 | 0.022                                      | 100% | 7 |

[a]Surface temperature

## Reference

1. X. Meng, T. Wang, L. Liu, S. Ouyang, P. Li, H. Hu, T. Kako, H. Iwai, A. Tanaka and J. Ye, *Angew. Chem. Int. Ed.*, 2014, **53**, 11478-11482.
2. J. Yu, A. Muhetaer, X. Gao, Z. Zhang, Y. Yang, Q. Li, L. Chen, H. Liu and D. Xu, *Angew. Chem. Int. Ed.*, 2023, e202303135.
3. Y. Qi, L. Song, S. Ouyang, X. Liang, S. Ning, Q. Zhang and J. Ye, *Adv. Mater.*, 2020, **32**, 1903915.
4. T. Yan, N. Li, L. Wang, W. Ran, P. N. Duchesne, L. Wan, N. T. Nguyen, L. Wang, M. Xia and G. A. Ozin, *Nat. Commun.*, 2020, **11**, 6095.
5. H. Wang, J. Jia, L. Wang, K. Butler, R. Song, G. Casillas, L. He, N. P. Kherani, D. D. Perovic and L. Jing, *Advanced Science*, 2019, **6**, 1902170.
6. L. Wang, Y. Dong, T. Yan, Z. Hu, F. M. Ali, D. M. Meira, P. N. Duchesne, J. Y. Y. Loh, C. Qiu and E. Storey, *Nat. Commun.*, 2020, **11**, 2432.
7. L. B. Hoch, P. G. O'Brien, F. M. Ali, A. Sandhel, D. D. Perovic, C. A. Mims and G. A. Ozin, *Acs Nano*, 2016, **10**, 9017-9025.
